# Supplementary material for: Positive effect of dietary lutein and cholesterol on the undirected song activity of an opportunistic breeder
Source: PeerJ. 2016 Oct 6;4:e2512. doi: 10.7717/peerj.2512 (PMC5068346; doi:10.7717/peerj.2512)
Supplement: Supplemental Information 1 [file peerj-04-2512-s001.xlsx]

## Sheet: Sheet1
Individual	Treatment	Time	Wing (cm)	Tarsus (mm)	Mass (g)	TestoLog (pg*mL-1)	Eating (sec)	Resting (sec)	SqrtSong (sec)	SelfMaint (sec)	Locomotor (sec)	Song	OtherBehav (sec)	TotBehav(sec)
ZF01	CL	0	5.8	18.2	14.3	2.77004	372.57	320.95	4.58148	75.76	171.98	20.99	237.75	1200
ZF02	C	0	6.1	18.3	16.1	2.79399	114.45	781.48	7.35867	27.9	222.02	54.15	0	1200
ZF03	CA	0	6.2	18.4	19.1	2.70854	109.53	159.31	19.3176	32.5	178.75	373.17	346.74	1200
ZF04	CL	0	5.9	18.4	18.7	2.27617	177.84	489.7	6.58863	94.16	311.64	43.41	83.25	1200
ZF05	C	0	5.7	18.4	19.8	2.51071	150.21	194.4	17.6799	13.43	499.1	312.58	30.28	1200
ZF06	C	0	6.1	18.4	18.9	2.79424	37.36	171.98	15.0788	93.87	417.23	227.37	252.19	1200
ZF07	CA	0	6.2	18.4	17	2.55393	55.66	196.34	9.48472	13.23	481.59	89.96	363.22	1200
ZF08	CL	0	5.9	18.5	20.1	2.91689	100.39	235.8	9.27847	39.32	679.73	86.09	58.67	1200
ZF09	CA	0	6.2	18.4	21.3	2.82135	216.66	242.61	10.3755	47.81	555.48	107.65	29.79	1200
ZF10	CL	0	6	18.4	23.8	2.77028	230.74	237.33	13.3075	41.35	511.98	177.09	1.51	1200
ZF11	CA	0	5.9	18.4	19.6	3.41548	177.86	85.08	10.2201	43.87	707.65	104.45	81.09	1200
ZF12	CL	0	6.1	18.3	18.8	2.60329	137.97	485.89	17.5542	24.5	244.68	306.96	0	1200
ZF13	C	0	5.8	18.4	17	3.31221	30.24	690.51	15.0546	14.02	246.67	218.56	0	1200
ZF14	C	0	6	18.4	20.5	2.58847	255.86	307.8	9.46309	4.95	25.73	89.55	516.11	1200
ZF16	CL	0	5.3	18.2	17.9	2.29287	303.42	214.75	16.3692	156.19	145.22	267.95	112.47	1200
ZF17	CL	0	6.1	18.3	22.7	3.39769	73.31	57.52	9.58958	1.56	352.78	91.96	622.87	1200
ZF18	CA	0	5.8	18.5	20.3	2.46372	298.17	256.88	13.8163	71.52	105.03	190.89	277.51	1200
ZF19	CL	0	5.3	18.4	17.3	2.67627	325.28	217.25	12.4056	27.13	414.03	153.9	62.41	1200
ZF20	C	0	5.9	18.3	17.4	1.92651	47.54	426.53	16.3401	42.84	139.66	267	276.43	1200
ZF21	C	0	5.5	18.2	16.3	2.41829	268.53	123.99	6.50231	22.56	628.61	42.28	114.03	1200
ZF22	CA	0	6	18.2	23.7	2.4808	69.97	334.32	17.8771	362.44	113.68	319.59	0	1200
ZF23	CL	0	5.9	18.3	17.3	3.02703	58.8	420.48	13.4911	194.12	256.36	182.01	88.23	1200
ZF24	C	0	5.8	18.4	21.2	2.32983	194.27	103.24	10.7424	36.94	618.13	115.4	132.02	1200
ZF25	CA	0	6.4	18.4	19.1	2.56538	148.46	105.58	8.35703	37.08	614.18	69.84	224.86	1200
ZF26	CA	0	6.3	18.2	19.7	2.61904	407.24	407.83	10.4207	16.29	218.71	108.59	41.34	1200
ZF27	C	0	5.9	18.4	21.3	2.43528	323.12	359.39	6.97496	21.6	375.07	48.65	72.17	1200
ZF29	CA	0	6.3	18.4	20.9	2.60127	690.28	76.92	4.55082	30.78	340.01	20.71	41.3	1200
ZF30	C	0	6.1	18.3	24.6	2.26554	546.12	111.44	6.99285	58.53	403.45	48.9	31.56	1200
ZF31	C	0	5.8	18.3	21.1	2.21895	69.69	306.37	8.04425	81.63	142.27	64.69	535.35	1200
ZF32	CA	0	5.8	18.4	18.8	2.74982	605.63	197.48	8.00687	53.8	269.14	64.11	9.84	1200
ZF33	CL	0	5.8	18.3	21	2.05413	46.76	60.88	2.38537	15.16	802.93	5.69	268.58	1200
ZF34	CA	0	6.2	18.3	17.2	2.49542	735.16	145.2	11.5304	24.47	99.34	132.95	62.88	1200
ZF35	CL	0	5.9	18.4	19.3	2.521	202.31	177.14	3.22645	12.57	796.38	10.41	1.19	1200
ZF36	CL	0	5.6	18.3	21.6	2.08315	147.16	240.38	3.60555	5.13	707.6	13.01	86.72	1200
ZF37	CL	0	6	18.4	21.9	0.678601	374.57	138.88	15.8329	162.11	230.96	250.69	42.79	1200
ZF38	CA	0	6.2	18.3	16.3	2.91652	145.93	343.34	16.7884	87.42	310.17	281.84	31.3	1200
ZF39	CL	0	6	18.3	18.5	2.57876	110.74	299.16	13.1518	36.32	220.13	172.96	360.69	1200
ZF40	CA	0	5.8	18.2	16.6	2.62559	38.64	655.12	16.6715	114.65	111.77	277.95	1.87	1200
ZF41	CA	0	6.3	18.4	19.1	2.48944	345.72	23.46	7.51598	62.23	687.86	56.48	24.25	1200
ZF42	C	0	6.1	18.3	15.5	2.50157	165.48	276.73	12.2845	46.71	532.35	150.87	27.86	1200
ZF43	CL	0	5.8	18.3	19.6	2.30821	343.43	265.84	6.59621	37.08	501.02	43.52	9.11	1200
ZF44	C	0	5.7	18.2	17.2	3.26879	241.83	282.84	10.5891	10.14	498.54	112.14	54.51	1200
ZF45	C	0	6	18.3	17	3.29041	169.99	235.22	9.15587	40.15	239.58	83.83	431.23	1200
ZF01	CL	15	5.8	18.2	15.3	2.5198	201.19	204.46	12.064	117.34	469.02	145.53	62.46	1200
ZF02	C	15	6.1	18.3	16.2	2.92472	130.92	258.13	10.7163	101.61	580.52	114.84	13.98	1200
ZF03	CA	15	6.2	18.4	18.7	2.70522	372.65	185.55	9.49789	33.55	343.03	90.22	175	1200
ZF04	CL	15	5.9	18.4	18.9	2.23063	276.37	139.66	6.91665	57.61	604.49	47.84	74.03	1200
ZF05	C	15	5.7	18.4	19.9	2.62206	290.64	201.54	11.2716	177.33	368.96	127.06	34.47	1200
ZF06	C	15	6.1	18.4	18.6	2.70017	64.22	319.89	17.5827	47	418.56	309.16	41.17	1200
ZF07	CA	15	6.2	18.4	17.6	2.42985	129.98	291.87	9.3707	251.7	376.29	87.81	62.35	1200
ZF08	CL	15	5.9	18.5	20.4	2.44023	286.97	190.66	11.2814	92.28	489.84	127.27	12.98	1200
ZF09	CA	15	6.2	18.4	20.5	2.75462	275.37	392.11	15.1288	108.67	191.73	228.87	3.25	1200
ZF10	CL	15	6	18.4	22.4	2.54033	398.12	237.87	12.7546	123.56	266.09	162.69	11.67	1200
ZF11	CA	15	5.9	18.4	19.9	2.18667	196.52	186.5	17.2398	223.03	274.33	297.2	22.42	1200
ZF12	CL	15	6.1	18.3	18.9	2.50328	5.6	407.85	16.0381	336.68	192.65	257.22	0	1200
ZF13	C	15	5.8	18.4	16.9	3.08447	347.14	338.96	8.7983	133.33	197.46	77.41	105.7	1200
ZF14	C	15	6	18.4	20.6	2.53571	238.52	734.34	12.6602	11.31	51.26	160.28	4.29	1200
ZF16	CL	15	5.3	18.2	18.7	2.63106	319.75	226.06	12.6044	220.79	187.86	158.88	86.66	1200
ZF17	CL	15	6.1	18.3	22.4	2.66058	154.37	44.48	8.22679	11.04	235.88	67.68	686.55	1200
ZF18	CA	15	5.8	18.5	19.1	2.3335	217.74	231.93	15.5213	206.86	265.76	240.91	36.8	1200
ZF19	CL	15	5.3	18.4	17.7	1.57997	292.1	271.77	13.0457	72.09	379.39	170.19	14.46	1200
ZF20	C	15	5.9	18.3	17.7	1.31013	161.3	121.82	13.0146	176.74	445.84	169.38	124.92	1200
ZF21	C	15	5.5	18.2	16.2	2.49002	220.42	62.49	9.40851	81.87	734.74	88.51	11.97	1200
ZF22	CA	15	6	18.2	22.5	2.22063	477.12	653.62	5.92706	19.4	14.73	35.13	0	1200
ZF23	CL	15	5.9	18.3	17.5	2.88518	154.27	196.98	12.3028	165.11	520.15	151.36	12.13	1200
ZF24	C	15	5.8	18.4	22.1	2.39999	203.47	106.21	10.3937	104.46	637.57	108.03	40.26	1200
ZF25	CA	15	6.4	18.4	21	2.38702	292.08	105.32	1.04403	23.26	409.36	1.09	368.89	1200
ZF26	CA	15	6.3	18.2	19.3	2.38043	286.3	350.31	12.1844	71.97	342.95	148.47	0	1200
ZF27	C	15	5.9	18.4	19.5	2.04604	215.97	128.76	11.0404	132.82	567.62	121.89	32.94	1200
ZF29	CA	15	6.3	18.4	21.4	2.6047	363.87	60.11	8.26801	592.61	59.47	68.36	55.58	1200
ZF30	C	15	6.1	18.3	23.8	2.03087	494.72	147.65	5.28205	47.09	415.66	27.9	66.98	1200
ZF31	C	15	5.8	18.3	23.6	2.84093	340.82	133.31	5.76281	191.46	470.38	33.21	30.82	1200
ZF32	CA	15	5.8	18.4	18.6	2.24434	63.64	264	11.5169	529.28	207.75	132.62	2.71	1200
ZF33	CL	15	5.8	18.3	20.4	2.10847	72.07	130.52	7.70973	128.36	776.65	59.45	32.95	1200
ZF34	CA	15	6.2	18.3	15.9	2.08751	499.59	268.57	11.0073	25.58	285.1	121.16	0	1200
ZF35	CL	15	5.9	18.4	19.2	1.93537	144.27	530.28	9.62756	56.82	375.94	92.69	0	1200
ZF36	CL	15	5.6	18.3	20.1	2.23551	434.86	515.71	11.3737	107.56	13.69	128.18	0	1200
ZF37	CL	15	6	18.4	21.4	0	259.74	71.33	13.5241	157.87	528.16	182.9	0	1200
ZF38	CA	15	6.2	18.3	16.8	2.71898	241.68	135.93	16.0237	221.75	287.42	256.75	56.47	1200
ZF39	CL	15	6	18.3	22.5	1.87368	40.99	313.14	17.7584	241.37	260.63	315.36	28.51	1200
ZF40	CA	15	5.8	18.2	16.7	1.22063	49.64	184.6	17.1971	94.14	575.89	295.73	0	1200
ZF41	CA	15	6.3	18.4	20.9	2.2048	5.89	338.28	4.87032	61.37	619.68	23.73	151.05	1200
ZF42	C	15	6.1	18.3	15.3	1.58773	316.43	188.49	9.77036	102.1	444.79	95.45	52.74	1200
ZF43	CL	15	5.8	18.3	19	2.29439	65.39	335.45	14.7577	111.53	470.17	217.46	0	1200
ZF44	C	15	5.7	18.2	17.6	2.02162	256.67	155.56	12.488	63.93	567.9	155.94	0	1200
ZF45	C	15	6	18.3	17.4	3.09446	101.73	192.04	6.64304	158.13	701.98	44.13	1.99	1200
ZF01	CL	30	5.8	18.2	15.4	2.63112	205.25	264.2	10.5394	197.7	421.77	111.08	0	1200
ZF02	C	30	6.1	18.3	15.9	2.5662	65.3	211.03	10.3	85.56	732.02	106.09	0	1200
ZF03	CA	30	6.2	18.4	18.9	2.60132	339.22	379.91	5.20673	242.42	125.99	27.11	85.35	1200
ZF04	CL	30	5.9	18.4	19.1	2.52162	100.48	310.43	6.69776	347.13	208.26	44.86	188.84	1200
ZF05	C	30	5.7	18.4	19.7	2.36747	179.3	317.96	10.5195	252.41	229.43	110.66	110.24	1200
ZF06	C	30	6.1	18.4	19.6	2.40349	103.99	260.52	9.92724	50.54	686.41	98.54	0	1200
ZF07	CA	30	6.2	18.4	18.1	2.54799	82.89	251.49	6.04318	102.06	722.23	36.51	4.82	1200
ZF08	CL	30	5.9	18.5	21	2.50525	102.67	199.06	10.0379	275.07	522.44	100.76	0	1200
ZF09	CA	30	6.2	18.4	19.9	2.4423	123.48	322.39	13.5772	252.63	309.72	184.34	7.44	1200
ZF10	CL	30	6	18.4	22.8	2.38701	170.23	204.86	13.3499	206.54	437.23	178.21	2.93	1200
ZF11	CA	30	5.9	18.4	20.5	3.18798	164.54	164.19	13.971	445.31	225.78	195.18	5	1200
ZF12	CL	30	6.1	18.3	19.3	2.45827	81.1	239.67	17.4548	491.64	82.92	304.67	0	1200
ZF13	C	30	5.8	18.4	15.8	2.47795	67.04	521	10.1671	290.05	186.01	103.38	32.52	1200
ZF14	C	30	6	18.4	20.5	2.26297	66.29	811.05	5.04083	94.73	19.9	25.41	182.62	1200
ZF16	CL	30	5.3	18.2	17.8	2.14453	440.23	552.36	8.27285	102.24	16.53	68.44	20.2	1200
ZF17	CL	30	6.1	18.3	19.4	1.90511	68.8	637.32	9.16079	406.82	3.13	83.93	0	1200
ZF18	CA	30	5.8	18.5	20.7	2.16482	273.42	249.07	15.4217	174.23	265.45	237.83	0	1200
ZF19	CL	30	5.3	18.4	18.3	2.23883	406.92	219.64	12.1425	16.45	409.55	147.44	0	1200
ZF20	C	30	5.9	18.3	18.3	1.80124	0	1198.97	1.01489	0	0	1.03	0	1200
ZF21	C	30	5.5	18.2	16.6	2.30009	214.61	341.57	6.95485	116.52	378.93	48.37	100	1200
ZF22	CA	30	6	18.2	22.7	1.1517	297.81	416.57	10.5262	264.2	105.36	110.8	5.26	1200
ZF23	CL	30	5.9	18.3	16.8	2.19408	289.64	183.07	9.20923	151.11	375.61	84.81	115.76	1200
ZF24	C	30	5.8	18.4	20.9	2.31499	133.23	221.57	16.0571	150.65	427.04	257.83	9.68	1200
ZF25	CA	30	6.4	18.4	19.6	2.23399	261.98	215.76	12.0942	84.62	418.28	146.27	73.09	1200
ZF26	CA	30	6.3	18.2	19.3	2.00158	113.66	424.73	11.7898	275.55	232.71	139	14.35	1200
ZF27	C	30	5.9	18.4	18.7	0.509325	351.86	168	10.1789	62.79	503.9	103.61	9.84	1200
ZF29	CA	30	6.3	18.4	20.5	2.48359	121.57	141.88	12.47	282.59	225.34	155.28	273.34	1200
ZF30	C	30	6.1	18.3	23.2	1.41208	462.93	133.54	8.28975	256.65	278.16	68.72	0	1200
ZF31	C	30	5.8	18.3	22.3	1.50379	147.8	177.38	2.16333	8.6	853.66	4.68	7.88	1200
ZF32	CA	30	5.8	18.4	18.2	2.21574	173.17	358.37	11.5793	427.37	107.01	134.08	0	1200
ZF33	CL	30	5.8	18.3	18.9	1.57382	75.04	259.96	6.34665	59.87	764.86	40.27	0	1200
ZF34	CA	30	6.2	18.3	15.5	1.92182	343.11	348.98	15.3147	122.45	150.92	234.54	0	1200
ZF35	CL	30	5.9	18.4	19.4	0	161.25	577.03	11.0521	44.71	291.12	122.15	3.74	1200
ZF36	CL	30	5.6	18.3	19.3	1.15995	303.18	290.26	16.3193	275.65	64.6	266.31	0	1200
ZF37	CL	30	6	18.4	20.7	0	166.76	188.59	12.4109	394.6	296.02	154.03	0	1200
ZF38	CA	30	6.2	18.3	16.9	0	159.61	241.98	18.0094	425.02	49.05	324.34	0	1200
ZF39	CL	30	6	18.3	18.6	0	55.3	388.54	14.4097	178.67	265.2	207.64	104.65	1200
ZF40	CA	30	5.8	18.2	15.5	0	97.78	382.61	15.0977	171.16	309.48	227.94	11.03	1200
ZF41	CA	30	6.3	18.4	19.4	0	335.35	96.53	14.7648	117.57	432.55	218	0	1200
ZF42	C	30	6.1	18.3	15	0	281.25	210.6	10.6869	164.66	429.28	114.21	0	1200
ZF43	CL	30	5.8	18.3	19.1	0	62.88	498.87	17.1788	109.26	233.88	295.11	0	1200
ZF44	C	30	5.7	18.2	17.7	2.40791	244.32	212.41	9.97848	44.59	546.22	99.57	52.89	1200
ZF45	C	30	6	18.3	17.1	2.4958	0.14	22.58	4.75	76.73	197.03	22.58	880.94	1200
					Note: In the category "OtherBehav" we included any activity performed by the focal bird that did not have an obvious function
